# Supplementary material
Source: PubMed Central journal article supplement (PMC10271677)
Supplement: S1368980015000919sup001.pdf [file S1368980015000919sup001.pdf]

## Supplementary material

### Do supermarkets contribute to the obesity pandemic in developing countries?

**Table 1S** Descriptive statistics for variables used in adult nutrition models

| Variable                                                 | Mean      | Standard deviation |
|----------------------------------------------------------|-----------|--------------------|
| BMI                                                      | 24.893    | 4.845              |
| Overweight (dummy)                                       | 0.270     | 0.444              |
| Obese (dummy)                                            | 0.143     | 0.350              |
| Underweight (dummy)                                      | 0.039     | 0.194              |
| Joule consumption per day (kJ)                           | 14019.65  | 5553.162           |
| Calorie consumption per day (kcal)                       | 3350.776  | 1327.238           |
| Share of joules/calories from processed foods (%)        | 48.51     | 16.21              |
| Food expenditure (Ksh per AE and month)                  | 6099.922  | 4628.725           |
| Buys in supermarket (dummy)                              | 0.580     | 0.494              |
| Supermarket purchase share (% of total food expenditure) | 9.671     | 11.596             |
| Distance to nearest supermarket (km)                     | 15.105    | 20.478             |
| Age (years)                                              | 34.763    | 11.905             |
| Female (dummy)                                           | 0.641     | 0.480              |
| Heavy work (dummy)                                       | 0.460     | 0.499              |
| Leisure-time physical activity (hours per week)          | 8.806     | 7.221              |
| Household expenditure (Ksh per AE and month)             | 12005.460 | 10041.010          |
| Education of person responsible for food (years)         | 9.724     | 3.778              |
| Household size (AE)                                      | 2.642     | 1.233              |
| Married household head (dummy)                           | 0.735     | 0.442              |
| Household does farming (dummy)                           | 0.654     | 0.476              |
| Household owns television (dummy)                        | 0.598     | 0.491              |
| Distance to nearest district hospital (km)               | 10.426    | 7.171              |
| Number of observations                                   | 615       |                    |

Ksh, Kenyan shillings; AE, adult equivalent.

**Table 2S** Descriptive statistics for variables used in child/adolescent nutrition models

| Variable                                                   | Mean     | Standard deviation |
|------------------------------------------------------------|----------|--------------------|
| Height-for-age Z-scores (HAZ)                              | -1.049   | 1.296              |
| Stunted (dummy)                                            | 0.208    | 0.407              |
| BMI-for-age Z-scores (BAZ)                                 | -0.308   | 1.000              |
| Overweight/obese (dummy)                                   | 0.097    | 0.297              |
| Joule consumption per day (kJ)                             | 10138.46 | 5082.24            |
| Calorie consumption per day (kcal)                         | 2423.15  | 1214.68            |
| Share of joules from processed foods (%)                   | 48.22    | 17.29              |
| Buys in supermarket (dummy)                                | 0.509    | 0.501              |
| Supermarket purchase share (% of total food expenditure)   | 8.480    | 11.204             |
| Distance to nearest supermarket (km)                       | 15.489   | 19.763             |
| Age (months)                                               | 115.755  | 43.717             |
| Female (dummy)                                             | 0.481    | 0.501              |
| Physical education at school (hours per week)              | 1.473    | 2.076              |
| Leisure-time physical activity (hours per week)            | 16.589   | 9.504              |
| Malaria or respiratory infection during last month (dummy) | 0.093    | 0.291              |
| Height of female adult measured in household (cm)          | 158.126  | 5.845              |
| Age of female adult measured in the household (years)      | 35.213   | 10.513             |
| Age of female adult when the child was born (years)        | 25.567   | 9.791              |
| Female adult is the mother (dummy)                         | 0.833    | 0.374              |
| Household treats drinking water (dummy)                    | 0.477    | 0.501              |
| Household expenditure (Ksh per AE and month)               | 9223.462 | 6193.470           |
| Education of person responsible for food (years)           | 8.769    | 3.833              |
| Household size (AE)                                        | 3.228    | 1.196              |
| Married household head (dummy)                             | 0.75     | 0.434              |
| Household does farming (dummy)                             | 0.699    | 0.460              |
| Household owns television (dummy)                          | 0.537    | 0.500              |
| Distance to nearest district hospital (km)                 | 9.747    | 7.050              |
| Distance to nearest health care center (km)                | 2.087    | 2.159              |
| Number of observations                                     | 216      |                    |

Ksh, Kenyan shillings; AE, adult equivalent.

**Table 3S** First-stage results of instrumental variable models for impact of supermarket purchase on adult nutrition

| Explanatory variables                             | Buys in supermarket<br>(dummy) | Supermarket purchase<br>share (%) |
|---------------------------------------------------|--------------------------------|-----------------------------------|
| Distance to nearest supermarket (log of km)       | -0.502 <sup>***</sup> (0.04)   | -2.272 <sup>***</sup> (0.19)      |
| Age (years)                                       | -0.021 <sup>**</sup> (0.01)    | -0.097 <sup>**</sup> (0.04)       |
| Female (dummy)                                    | -0.115 (0.43)                  | -1.249 (2.19)                     |
| Female-age interaction                            | 0.007 (0.01)                   | 0.033 (0.05)                      |
| Heavy work (dummy)                                | -0.177 (0.14)                  | -0.249 (0.72)                     |
| Leisure-time physical activity (hours per week)   | 0.016 <sup>*</sup> (0.01)      | -0.008 (0.05)                     |
| Household expenditure (1000 Ksh per AE and month) | 0.072 <sup>***</sup> (0.01)    | 0.183 <sup>***</sup> (0.04)       |
| Education of person responsible for food (years)  | 0.048 <sup>**</sup> (0.02)     | 0.411 <sup>***</sup> (0.11)       |
| Married household head (dummy)                    | 0.676 <sup>***</sup> (0.17)    | 0.788 (0.96)                      |
| Distance to nearest district hospital (log of km) | 0.004 (0.05)                   | -1.363 <sup>***</sup> (0.33)      |
| Constant                                          | -0.401 (0.44)                  | 11.065 <sup>***</sup> (2.34)      |
| Number of observations                            | 615                            | 615                               |
| Chi-squared test statistic                        | 242.159 <sup>***</sup>         | --                                |
| <i>F</i> statistic                                | --                             | 44.73 <sup>***</sup>              |

Ksh, Kenyan shillings; AE, adult equivalent. \* $P < 0.1$ , \*\*  $P < 0.05$ , \*\*\* $P < 0.01$ . Coefficient estimates are shown with robust standard errors in parentheses.

**Table 4S** First-stage results of instrumental variable models for impact of supermarket purchase on child/adolescent nutrition

| Explanatory variables                              | Buys in supermarket (dummy)  |                              | Supermarket purchase share (%) |
|----------------------------------------------------|------------------------------|------------------------------|--------------------------------|
|                                                    | BAZ model                    | HAZ/stunted models           |                                |
| Distance to nearest supermarket (log of km)        | -0.547 <sup>***</sup> (0.07) | -0.567 <sup>***</sup> (0.07) | -3.092 <sup>***</sup> (0.28)   |
| Age (months)                                       | -0.007 <sup>**</sup> (0.00)  | -0.009 <sup>***</sup> (0.00) | -0.017 (0.01)                  |
| Female (dummy)                                     | 0.073 (0.24)                 | 0.044 (0.24)                 | -1.241 (1.16)                  |
| Household expenditure (1000 Ksh per AE and month)  | 0.092 <sup>***</sup> (0.03)  | 0.080 <sup>***</sup> (0.03)  | 0.347 <sup>***</sup> (0.11)    |
| Education of person responsible for food (years)   | 0.024 (0.04)                 | 0.028 (0.04)                 | 0.169 (0.21)                   |
| Married household head (dummy)                     | 0.206 (0.28)                 | 0.163 (0.28)                 | -0.362 (1.49)                  |
| Malaria or respiratory infection (dummy)           | --                           | 0.144 (0.40)                 | -0.675 (2.15)                  |
| Height of female adult (cm)                        | --                           | -0.010 (0.02)                | -0.024 (0.08)                  |
| Age of female adult when child was born (years)    | --                           | -0.007 (0.01)                | 0.015 (0.06)                   |
| Household treats drinking water (dummy)            | --                           | 0.281 (0.24)                 | 1.464 (1.16)                   |
| Distance to nearest health care center (log of km) | --                           | 0.052 (0.13)                 | -1.812 <sup>**</sup> (0.71)    |
| Physical education at school (hours per week)      | 0.036 (0.05)                 | --                           | --                             |
| Leisure-time physical activity (hours per week)    | 0.018 (0.01)                 | --                           | --                             |
| Age of female adult (years)                        | -0.006 (0.01)                | --                           | --                             |
| Distance to nearest district hospital (log of km)  | -0.029 (0.10)                | --                           | --                             |
| Constant                                           | 0.033 (0.79)                 | 2.219 (3.02)                 | 13.296 (12.68)                 |
| Observations                                       | 216                          | 216                          | 216                            |
| Chi-squared test statistic                         | 96.365 <sup>***</sup>        | 111.231 <sup>***</sup>       | --                             |
| <i>F</i> statistic                                 | --                           | --                           | 22.2 <sup>***</sup>            |

BAZ, BMI-for-age Z-score; HAZ, height-for-age Z-score; Ksh, Kenyan shillings; AE, adult equivalent. \* $P < 0.1$ , \*\* $P < 0.05$ , \*\*\* $P < 0.01$ . Coefficient estimates are shown with robust standard errors in parentheses.

**Table 5S** Impact of supermarket purchase on child/adolescent mild and severe stunting

|                                                    | Mildly stunted (HAZ < -1)       |                                 | Severely stunted (HAZ < -3)     |                                 |
|----------------------------------------------------|---------------------------------|---------------------------------|---------------------------------|---------------------------------|
| Buys in supermarket (dummy)                        | -0.131 (0.09)                   | --                              | -0.231 <sup>***</sup><br>(0.05) | --                              |
| Supermarket purchase share (%)                     | --                              | -0.009 <sup>**</sup><br>(0.00)  | --                              | -0.016 <sup>***</sup><br>(0.00) |
| Age (months)                                       | 0.003 <sup>***</sup><br>(0.00)  | 0.003 <sup>***</sup><br>(0.00)  | 0.001 <sup>**</sup> (0.00)      | 0.001 <sup>***</sup><br>(0.00)  |
| Female (dummy)                                     | -0.021 (0.06)                   | -0.032 (0.06)                   | -0.004 (0.03)                   | -0.025 (0.03)                   |
| Household expenditure (1000 Ksh per AE and month)  | -0.007 (0.01)                   | -0.005 (0.01)                   | 0.003 (0.00)                    | 0.004 (0.00)                    |
| Education of person responsible for food (years)   | -0.006 (0.01)                   | -0.004 (0.01)                   | -0.012 <sup>***</sup><br>(0.00) | -0.012 <sup>*</sup> (0.01)      |
| Married household head (dummy)                     | -0.087 (0.07)                   | -0.099 (0.07)                   | -0.033 (0.03)                   | -0.063 <sup>*</sup> (0.03)      |
| Malaria or respiratory infection (dummy)           | 0.097 (0.10)                    | 0.095 (0.10)                    | 0.177 <sup>***</sup><br>(0.04)  | 0.185 <sup>***</sup><br>(0.05)  |
| Height of female adult (cm)                        | -0.019 <sup>***</sup><br>(0.00) | -0.019 <sup>***</sup><br>(0.00) | -0.005 (0.00)                   | -0.005 (0.00)                   |
| Age of female when the child was born (years)      | -0.010 <sup>***</sup><br>(0.00) | -0.010 <sup>***</sup><br>(0.00) | -0.003 <sup>*</sup> (0.00)      | -0.003 <sup>*</sup> (0.00)      |
| Household treats drinking water                    | -0.105 <sup>*</sup> (0.06)      | -0.096 <sup>*</sup> (0.06)      | -0.017 (0.04)                   | -0.009 (0.03)                   |
| Distance to nearest health care center (log of km) | -0.052 <sup>*</sup> (0.03)      | -0.065 <sup>**</sup><br>(0.03)  | 0.048 <sup>**</sup> (0.02)      | 0.037 <sup>*</sup> (0.02)       |
| Number of observations                             | 216                             | 216                             | 216                             | 216                             |

HAZ, height-for-age Z-score; Ksh, Kenyan shillings; AE, adult equivalent. \* $P < 0.1$ , \*\*  $P < 0.05$ , \*\*\* $P < 0.01$ . Marginal effects are shown with robust standard errors in parentheses. Estimates are based on instrumental variable probit models with the supermarket purchase variables instrumented.

**Table 6S** Causal chain model to explain the impact of supermarket purchase on adult BMI

| Explanatory variables                             | BMI (Kg/m <sup>2</sup> )        | Joule consumption per day (kJ)      | Share of joules from processed foods (%) | Supermarket purchase share (%)  |
|---------------------------------------------------|---------------------------------|-------------------------------------|------------------------------------------|---------------------------------|
| Joules consumption per day (kJ)                   | 0.0005 <sup>***</sup><br>(0.00) | --                                  | --                                       | --                              |
| Share of joules from processed foods (%)          | 0.118 <sup>***</sup> (0.04)     | --                                  | --                                       | --                              |
| Age (years)                                       | 0.112 <sup>***</sup> (0.02)     | --                                  | --                                       | --                              |
| Female (dummy)                                    | 1.344 (1.23)                    | --                                  | --                                       | --                              |
| Female-age interaction                            | 0.040 (0.03)                    | --                                  | --                                       | --                              |
| Heavy work (dummy)                                | -0.672 <sup>*</sup> (0.37)      | --                                  | --                                       | --                              |
| Leisure-time physical activity (hours per week)   | -0.041 <sup>*</sup> (0.02)      | --                                  | --                                       | --                              |
| Supermarket purchase share (%)                    | --                              | 64.61 <sup>*</sup> (35.68)          | 0.330 <sup>***</sup> (0.11)              | --                              |
| Household expenditure (1000 Ksh per AE and month) | --                              | 163.42 <sup>***</sup><br>(24.16)    | -0.241 <sup>***</sup><br>(0.07)          | 0.144 <sup>***</sup> (0.04)     |
| Education of person responsible for food (years)  | --                              | -53.473<br>(63.00)                  | 0.755 <sup>***</sup> (0.19)              | 0.448 <sup>***</sup> (0.11)     |
| Household size (AE)                               | --                              | -128.079<br>(174.86)                | -0.990 <sup>*</sup> (0.52)               | --                              |
| Household does farming (dummy)                    | --                              | 752.541 <sup>*</sup><br>(452.02)    | -4.230 <sup>***</sup><br>(1.37)          | -2.522 <sup>***</sup><br>(0.79) |
| Household owns television (dummy)                 | --                              | --                                  | 3.075 <sup>**</sup> (1.29)               | 2.274 <sup>***</sup> (0.80)     |
| Distance to nearest supermarket (log of km)       | --                              | --                                  | --                                       | -2.564 <sup>***</sup><br>(0.18) |
| Constant                                          | 6.996 <sup>**</sup> (2.88)      | 11799.16 <sup>***</sup><br>(835.84) | 44.416 <sup>***</sup><br>(2.48)          | 6.420 <sup>***</sup> (1.22)     |
| Number of observations                            |                                 |                                     | 615                                      |                                 |
| Chi-squared                                       |                                 |                                     | 130.044 <sup>***</sup>                   |                                 |

Ksh, Kenyan shillings; AE, adult equivalent. \* $P < 0.1$ , \*\*  $P < 0.05$ , \*\*\* $P < 0.01$ . Coefficient estimates are shown with standard errors in parentheses. The system of simultaneous equations was estimated with three-stage least squares.

**Table 7S** Causal chain model to explain the impact of supermarket purchase on child/adolescent HAZ

| Explanatory variables                               | HAZ                  | Joule consumption per day (kJ) | Share of joules from processed foods (%) | Supermarket purchase share (%) |
|-----------------------------------------------------|----------------------|--------------------------------|------------------------------------------|--------------------------------|
| Joule consumption per day (kJ)                      | 0.0001*<br>(0.00)    | --                             | --                                       | --                             |
| Share of joules from processed foods (%)            | 0.025* (0.01)        | --                             | --                                       | --                             |
| Age (months)                                        | -0.009***<br>(0.00)  | --                             | --                                       | --                             |
| Female (dummy)                                      | 0.105 (0.15)         | --                             | --                                       | --                             |
| Malaria or respiratory infection (dummy)            | -0.436*<br>(0.26)    | --                             | --                                       | --                             |
| Height of female adult (cm)                         | 0.059***<br>(0.01)   | --                             | --                                       | --                             |
| Age of female adult when the child was born (years) | 0.019* (0.01)        | --                             | --                                       | --                             |
| Household treats drinking water (dummy)             | 0.364**<br>(0.16)    | --                             | --                                       | --                             |
| Supermarket purchase share (%)                      | --                   | 72.133<br>(55.42)              | 0.447**<br>(0.18)                        | --                             |
| Household expenditure (1000 Ksh per AE and month)   | --                   | 206.177***<br>(67.44)          | -0.358 (0.23)                            | 0.331***<br>(0.11)             |
| Education of person responsible for food (years)    | --                   | -98.650<br>(127.08)            | -2.356**<br>(0.96)                       | 0.201 (0.18)                   |
| Household size (AE)                                 | --                   | -175.239<br>(290.47)           | 0.876***<br>(0.33)                       | --                             |
| Household does farming (dummy)                      | --                   | -172.916<br>(731.21)           | -6.007**<br>(2.42)                       | -1.456 (1.28)                  |
| Education of household head (years)                 | --                   | -137.456<br>(115.50)           | --                                       | --                             |
| Age of female adult (years)                         | --                   | 14.507<br>(33.03)              | --                                       | --                             |
| Household owns television (dummy)                   | --                   | --                             | 1.918 (2.17)                             | 0.566 (1.28)                   |
| Distance to nearest supermarket (log of km)         | --                   | --                             | --                                       | -2.830***<br>(0.30)            |
| Constant                                            | -12.428***<br>(2.40) | 9974.228***<br>(1879.18)       | 50.831***<br>(4.52)                      | 7.586***<br>(1.84)             |
| Number of observations                              |                      |                                | 216                                      |                                |
| Chi-squared                                         |                      |                                | 65.561***                                |                                |

HAZ, height-for-age Z-score; Ksh, Kenyan shillings; AE, adult equivalent. \* $P < 0.1$ , \*\*  $P < 0.05$ , \*\*\* $P < 0.01$ . Coefficient estimates are shown with standard errors in parentheses. The system of simultaneous equations was estimated with three-stage least squares.
